# Supplementary material for: Seasonality and uncertainty in global COVID-19 growth rates
Source: PubMed Central journal article supplement (PMC7959558; doi:10.1073/pnas.2008590117), 2020-10-13
Supplement: pnas.2008590117.sapp.pdf [file pnas.2008590117.sapp.pdf]

2  
3  
4  
5  
6  
7  
8  
9  
10  
11  
12  
13  
14  
15  
16  
17

Supplementary Information for

## **Seasonality and uncertainty in global COVID-19 growth rates**

Cory Merow & Mark C. Urban

Corresponding author: Cory Merow

Email: [cory.merow@gmail.com](mailto:cory.merow@gmail.com)

### **This PDF file includes:**

Figures S1 to S7

Tables S1

18 **Table S1:** Alternative models and parameter estimates. A comparison of models considered is  
 19 shown with median parameter values and followed by 95% credible intervals. Models are  
 20 ordered by LOOIC (leave-one-out information criterion). Of the 153,664 models that could be  
 21 constructed from the collection of variables we considered (each weather variable summarized  
 22 by the minimum, mean, and maximum over a 14- or 7-day window) we considered those which  
 23 were pertinent to our specific a priori hypotheses about the roles of temperature, humidity, and  
 24 UV on growth of COVID-19 infections. Variable names are abbreviated as: Temp=temperature,  
 25 UV=ultraviolet light, RH=relative humidity, AH=absolute humidity, PopDensity=Population  
 26 density, PropOver60=proportion of population over

|    | looic    | Intercept           | TempLag14mean      | TempLag14mean_sqrd  | tempUV            | uvLag14mean         | uvLag14max          | uvLag14min          | rhLag14mean         | rhLag14max | rhLag14min | ahLag14mean        | popDensity        | propOld             |
|----|----------|---------------------|--------------------|---------------------|-------------------|---------------------|---------------------|---------------------|---------------------|------------|------------|--------------------|-------------------|---------------------|
| 1  | -1361.95 | -2 (-2.09,-1.92)    | 0.23 (0.15,0.32)   |                     |                   |                     |                     |                     |                     |            |            |                    |                   |                     |
| 2  | -1360.65 | -1.92 (-2.04,-1.81) | 0.07 (-0.11,0.26)  | -0.1 (-0.2,0)       | 0.03 (-0.07,0.14) |                     | -0.44 (-0.53,-0.36) |                     | -0.05 (-0.11,0)     |            |            | 0.2 (-0.01,0.39)   | 0 (-0.1,0.08)     | -0.07 (-0.14,0)     |
| 3  | -1360.26 | -1.99 (-2.08,-1.91) | 0.23 (0.15,0.31)   |                     |                   |                     | -0.44 (-0.52,-0.35) |                     |                     |            |            |                    |                   | -0.08 (-0.15,-0.01) |
| 4  | -1357.66 | -2 (-2.09,-1.92)    | 0.22 (0.14,0.3)    |                     |                   |                     | -0.42 (-0.51,-0.34) |                     |                     |            |            |                    |                   | -0.07 (-0.14,-0.01) |
| 5  | -1355.65 | -1.96 (-2.07,-1.86) | 0.23 (0.1,0.37)    | -0.06 (-0.15,0.03)  | 0.02 (-0.08,0.12) |                     | -0.41 (-0.5,-0.32)  |                     |                     |            |            |                    |                   | -0.1 (-0.17,-0.02)  |
| 6  | -1355.21 | -1.94 (-2.05,-1.84) | 0.15 (-0.02,0.31)  | -0.08 (-0.17,0.01)  | 0.03 (-0.07,0.14) |                     | -0.43 (-0.52,-0.34) |                     |                     |            |            |                    | 0 (-0.09,0.08)    | -0.1 (-0.17,-0.02)  |
| 7  | -1354.06 | -1.93 (-2.04,-1.82) | 0.15 (-0.01,0.33)  | -0.09 (-0.18,0.01)  | 0.02 (-0.08,0.12) |                     | -0.42 (-0.5,-0.33)  |                     |                     |            |            |                    | 0.01 (-0.08,0.08) | -0.09 (-0.17,-0.02) |
| 8  | -1326.78 | -1.9 (-2.01,-1.79)  | -0.04 (-0.22,0.13) | -0.12 (-0.23,-0.02) | 0.12 (0.02,0.22)  | -0.4 (-0.51,-0.3)   |                     |                     | -0.22 (-0.32,-0.11) |            |            | 0.06 (-0.1,0.22)   | 0.01 (-0.07,0.09) | -0.08 (-0.16,0)     |
| 9  | -1325.48 | -1.9 (-2,-1.79)     | -0.04 (-0.21,0.15) | -0.12 (-0.22,-0.01) | 0.12 (0.02,0.23)  | -0.4 (-0.51,-0.3)   |                     |                     | -0.21 (-0.33,-0.11) |            |            | 0.06 (-0.1,0.22)   | 0.01 (-0.07,0.09) | -0.08 (-0.15,0)     |
| 10 | -1324.58 | -1.9 (-1.98,-1.82)  | 0.04 (-0.12,0.19)  |                     |                   | -0.42 (-0.52,-0.32) |                     |                     | -0.2 (-0.29,-0.12)  |            |            | 0.18 (0.08,0.27)   |                   | -0.07 (-0.15,0)     |
| 11 | -1323.18 | -1.9 (-1.98,-1.83)  | 0.05 (-0.1,0.2)    |                     | 0.02 (-0.04,0.09) | -0.42 (-0.52,-0.32) |                     |                     | -0.19 (-0.29,-0.08) |            |            | 0.14 (-0.04,0.31)  |                   | -0.07 (-0.15,0)     |
| 12 | -1323.14 | -1.93 (-2.04,-1.83) | 0.05 (-0.1,0.2)    |                     | 0.02 (-0.04,0.09) | -0.42 (-0.52,-0.32) |                     |                     | -0.18 (-0.29,-0.07) |            |            | 0.12 (-0.05,0.3)   |                   | -0.07 (-0.14,0.01)  |
| 13 | -1322.68 | -1.91 (-2.02,-1.81) | -0.01 (-0.18,0.18) | -0.11 (-0.21,-0.01) | 0.12 (0.02,0.23)  | -0.37 (-0.47,-0.27) |                     |                     | -0.21 (-0.32,-0.1)  |            |            | 0.2 (-0.01,0.39)   |                   |                     |
| 14 | -1321.60 | -1.95 (-2.05,-1.85) | 0.14 (0.06,0.22)   |                     | 0.03 (-0.03,0.1)  | -0.4 (-0.49,-0.3)   |                     |                     | -0.12 (-0.19,-0.06) |            |            |                    |                   | -0.07 (-0.14,0.01)  |
| 15 | -1321.20 | -1.87 (-1.97,-1.77) | 0.01 (-0.16,0.18)  | -0.03 (-0.09,0.03)  |                   | -0.41 (-0.52,-0.31) |                     |                     | -0.2 (-0.31,-0.09)  |            |            | 0.18 (-0.01,0.38)  |                   | -0.08 (-0.16,-0.01) |
| 16 | -1321.19 | -1.93 (-2.04,-1.84) | 0.13 (0.05,0.22)   | -0.07 (-0.17,0.02)  | 0.1 (0.0,0.2)     | -0.37 (-0.47,-0.27) |                     |                     | -0.12 (-0.19,-0.05) |            |            |                    |                   | -0.07 (-0.15,0.01)  |
| 17 | -1319.78 | -1.91 (-1.99,-1.84) | 0.14 (0.07,0.22)   |                     |                   | -0.39 (-0.48,-0.29) |                     |                     | -0.12 (-0.19,-0.05) |            |            |                    |                   | -0.07 (-0.15,0)     |
| 18 | -1319.36 | -1.94 (-2.05,-1.84) | 0.07 (-0.08,0.23)  |                     | 0.03 (-0.03,0.1)  | -0.39 (-0.49,-0.3)  |                     |                     | -0.18 (-0.29,-0.07) |            |            | 0.11 (-0.07,0.28)  |                   |                     |
| 19 | -1318.85 | -1.96 (-2.06,-1.86) | 0.16 (0.08,0.23)   |                     | 0.04 (-0.02,0.11) | -0.37 (-0.46,-0.28) |                     |                     | -0.13 (-0.19,-0.06) |            |            |                    |                   |                     |
| 20 | -1318.03 | -1.9 (-1.98,-1.83)  | 0.06 (-0.09,0.21)  |                     |                   | -0.39 (-0.48,-0.29) |                     |                     | -0.19 (-0.3,-0.09)  |            |            | 0.14 (-0.04,0.3)   |                   |                     |
| 21 | -1317.92 | -1.91 (-2,-1.82)    | 0.14 (0.06,0.22)   | -0.01 (-0.06,0.05)  |                   | -0.39 (-0.48,-0.28) |                     |                     | -0.12 (-0.19,-0.05) |            |            |                    |                   | -0.07 (-0.16,0)     |
| 22 | -1308.67 | -1.95 (-2.06,-1.85) | 0.17 (0.03,0.31)   | -0.07 (-0.17,0.02)  | 0.1 (0.0,0.19)    | -0.3 (-0.38,-0.21)  |                     |                     |                     |            |            | -0.08 (-0.21,0.03) |                   | -0.07 (-0.14,0)     |
| 23 | -1269.25 | -1.93 (-2.03,-1.83) | 0.03 (-0.11,0.16)  | -0.15 (-0.25,-0.05) | 0.19 (0.09,0.29)  |                     |                     | -0.15 (-0.23,-0.07) |                     |            |            | -0.03 (-0.15,0.09) |                   | -0.02 (-0.09,0.05)  |
| 24 | -1268.38 | -1.91 (-2.03,-1.81) | -0.05 (-0.23,0.14) | -0.17 (-0.29,-0.07) | 0.2 (0.1,0.31)    |                     |                     | -0.17 (-0.26,-0.08) | -0.07 (-0.18,0.04)  |            |            | 0.06 (-0.14,0.26)  | 0 (-0.09,0.08)    | -0.02 (-0.1,0.05)   |
| 25 | -1256.54 | -1.9 (-1.97,-1.83)  | 0.03 (-0.05,0.1)   |                     |                   |                     |                     | -0.18 (-0.25,-0.1)  | -0.03 (-0.1,0.03)   |            |            |                    |                   | -0.02 (-0.09,0.05)  |
| 26 | -1254.52 | -1.9 (-2,-1.79)     | -0.05 (-0.23,0.15) | -0.19 (-0.3,-0.09)  | 0.18 (0.09,0.28)  |                     |                     |                     | 0.02 (-0.08,0.12)   |            |            | -0.01 (-0.22,0.19) |                   | 0.01 (-0.06,0.08)   |

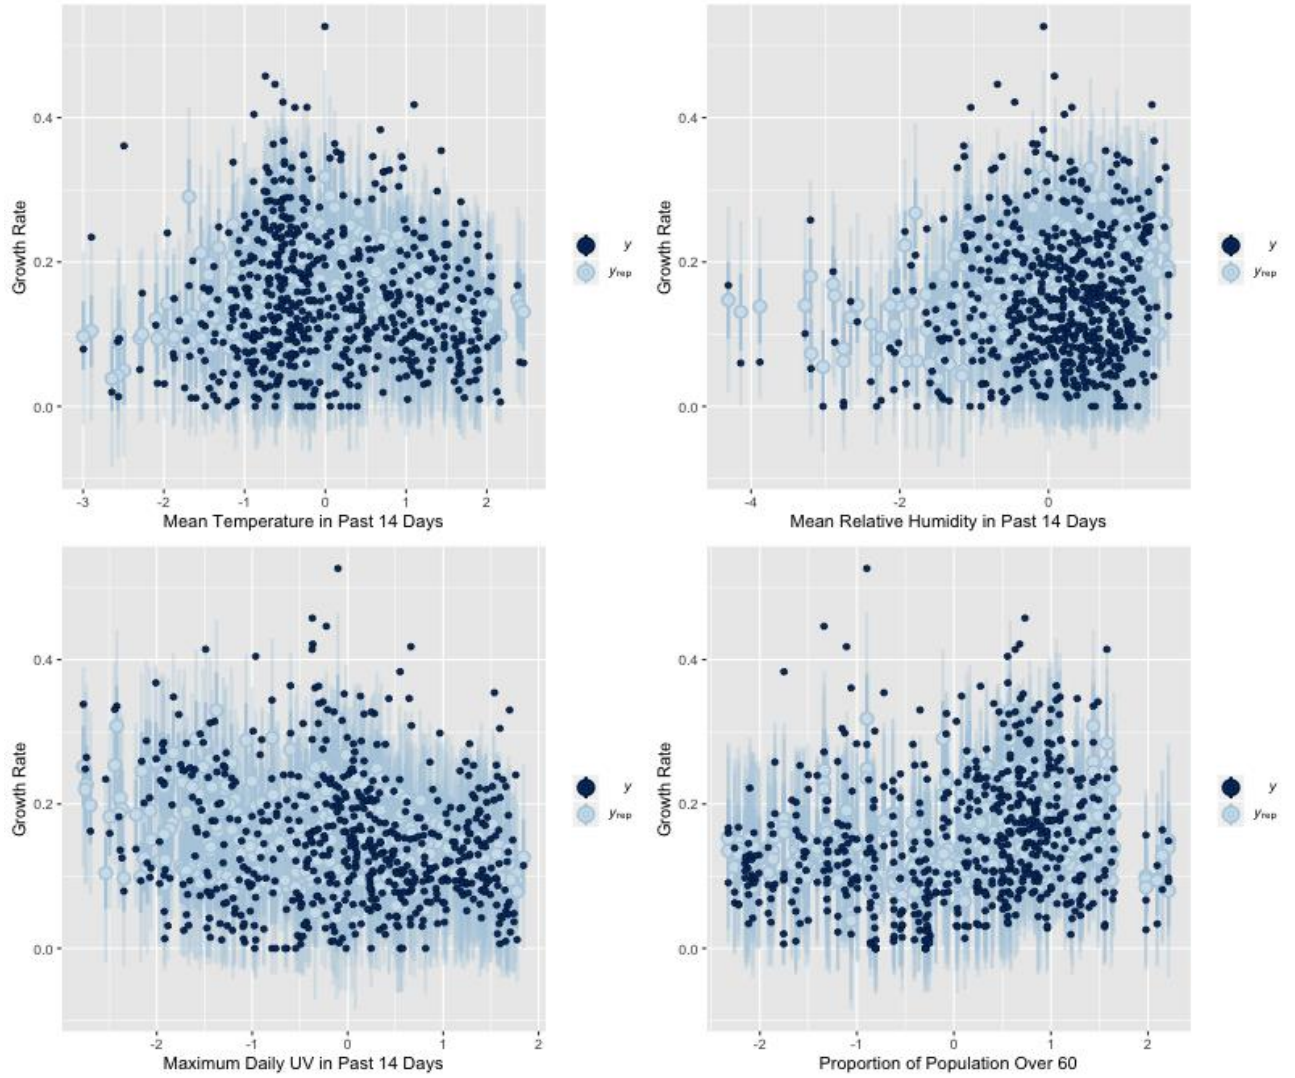

27

28 **Fig. S1.** Posterior predicted probabilities of growth rate reflect weak trends with

29 environment and high uncertainty in predictions.

30

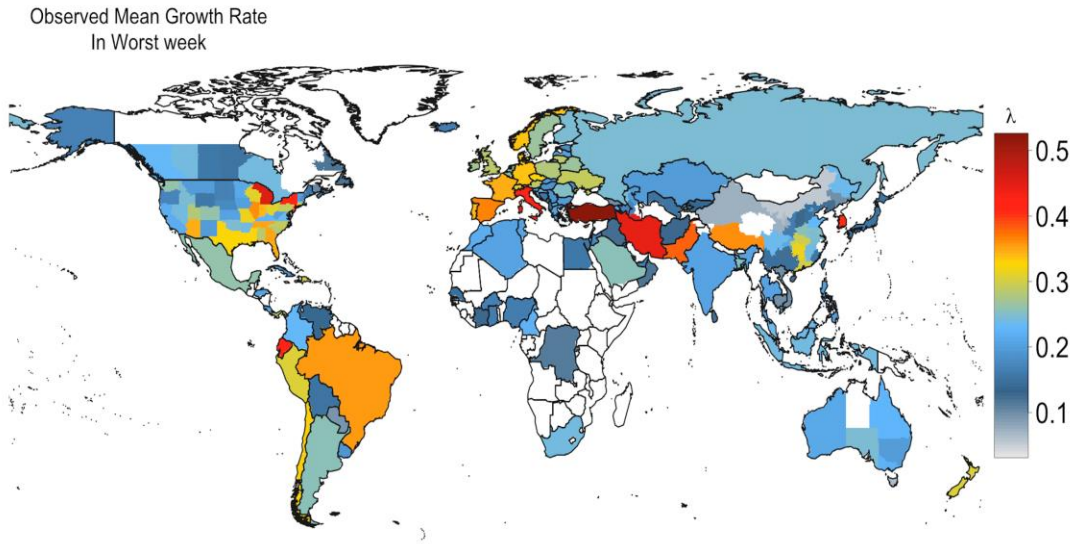

31

32 **Fig. S2.** A map of the growth rate of COVID-19 cases during the worst week considered  
33 in this study (Jan 22, 2020 - April 13, 2020).

34

35

Date of Highest Mean Growth Rate  
In Worst week

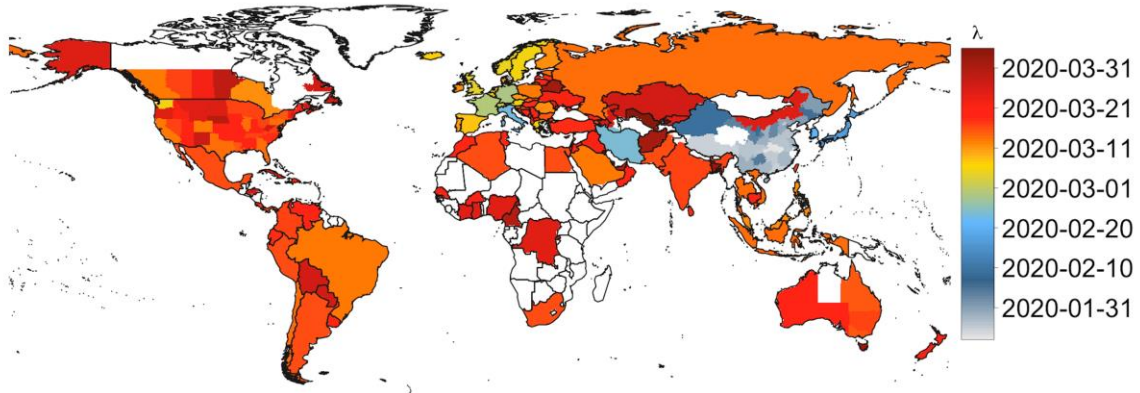

36

37 **Fig. S3.** A map of the date (first day of the week) of the mean growth rate of COVID-19  
38 cases during the worst week (as shown in Fig. S2) considered in this study (Jan 22, 2020  
39 - April 13, 2020).

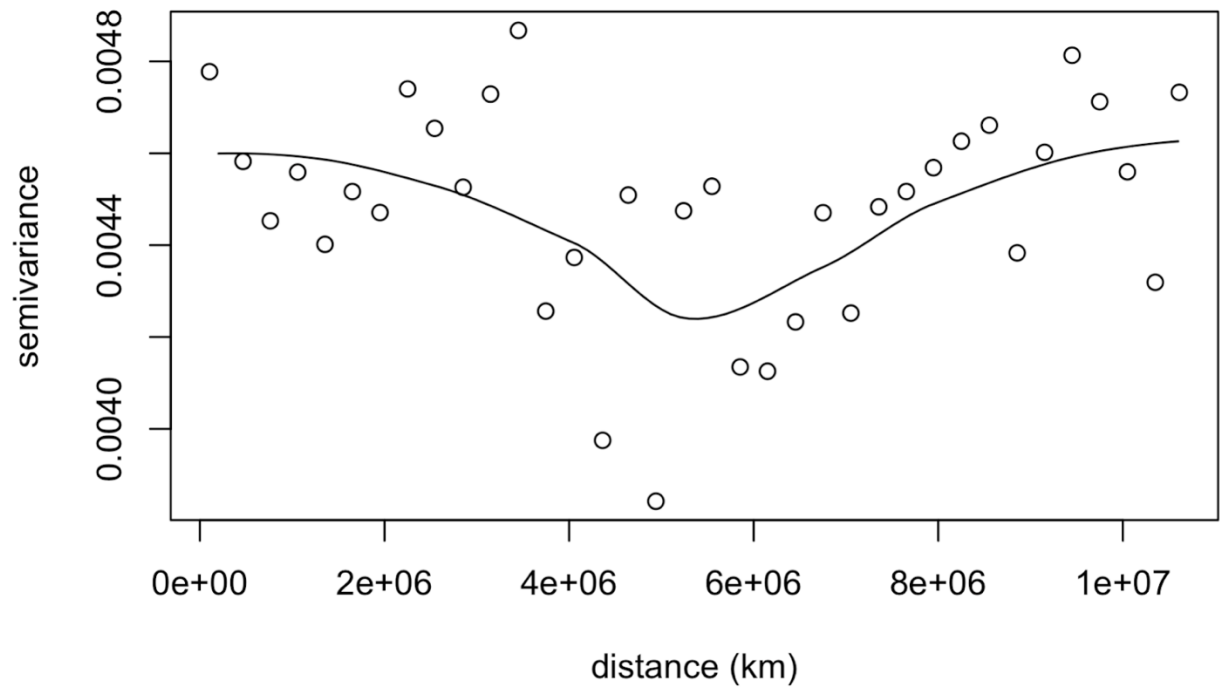

41

42 **Fig. S4.** Semivariogram of the model residuals from the best model, used to confirm that there

43 is no spatial dependence apparent.

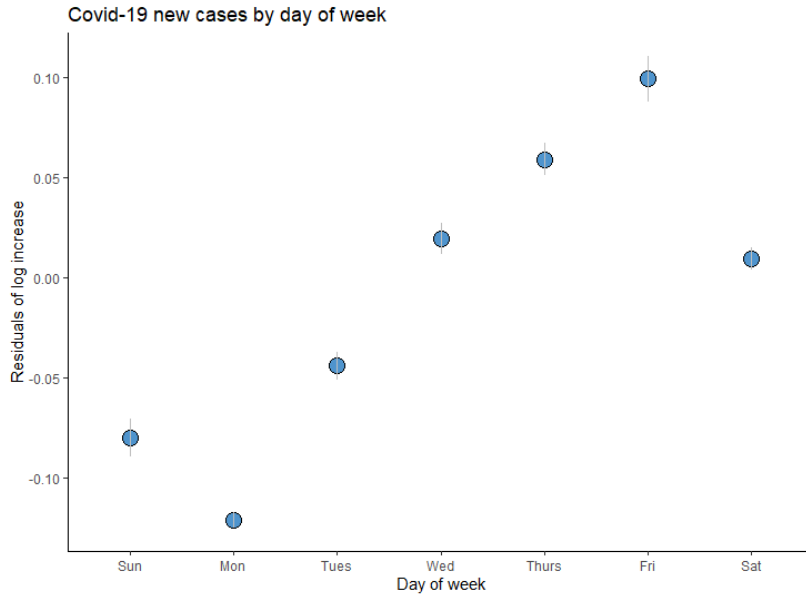

44

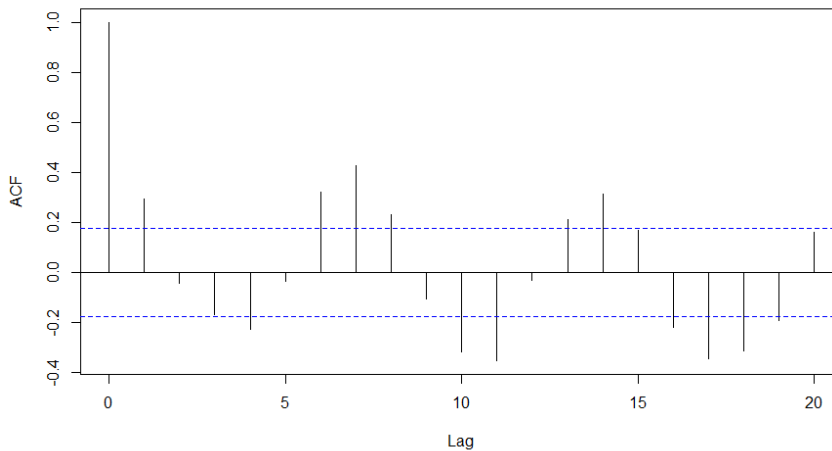

45

46 **Figure S5. Top,** Mean and standard error of the mean of the detrended residuals of log COVID-  
 47 19 daily increase in new cases by day of week. Detrending was done to remove the temporal  
 48 trend of increasing number of cases during the study period and was performed by calculating the  
 49 residuals of a cubic spline generalized additive model of daily log COVID-19 increase by day. The  
 50 Bayesian 95% credible intervals for Saturday through Wednesday did not overlap with Friday.  
 51 **Bottom,** Plot of temporal autocorrelation (ACF) of same data by lag time in days reveals a strong  
 52 weekly pattern as indicated by the significant peaks at  $t = 7$  and  $t = 14$  days. Lines that exceed  
 53 the dotted line are significantly different from zero. We restricted the analysis to the period  
 54 3/12/20 – 7/14/20 because preliminary analyses suggested high day-to-day variance due to early  
 55 vagaries in reporting.



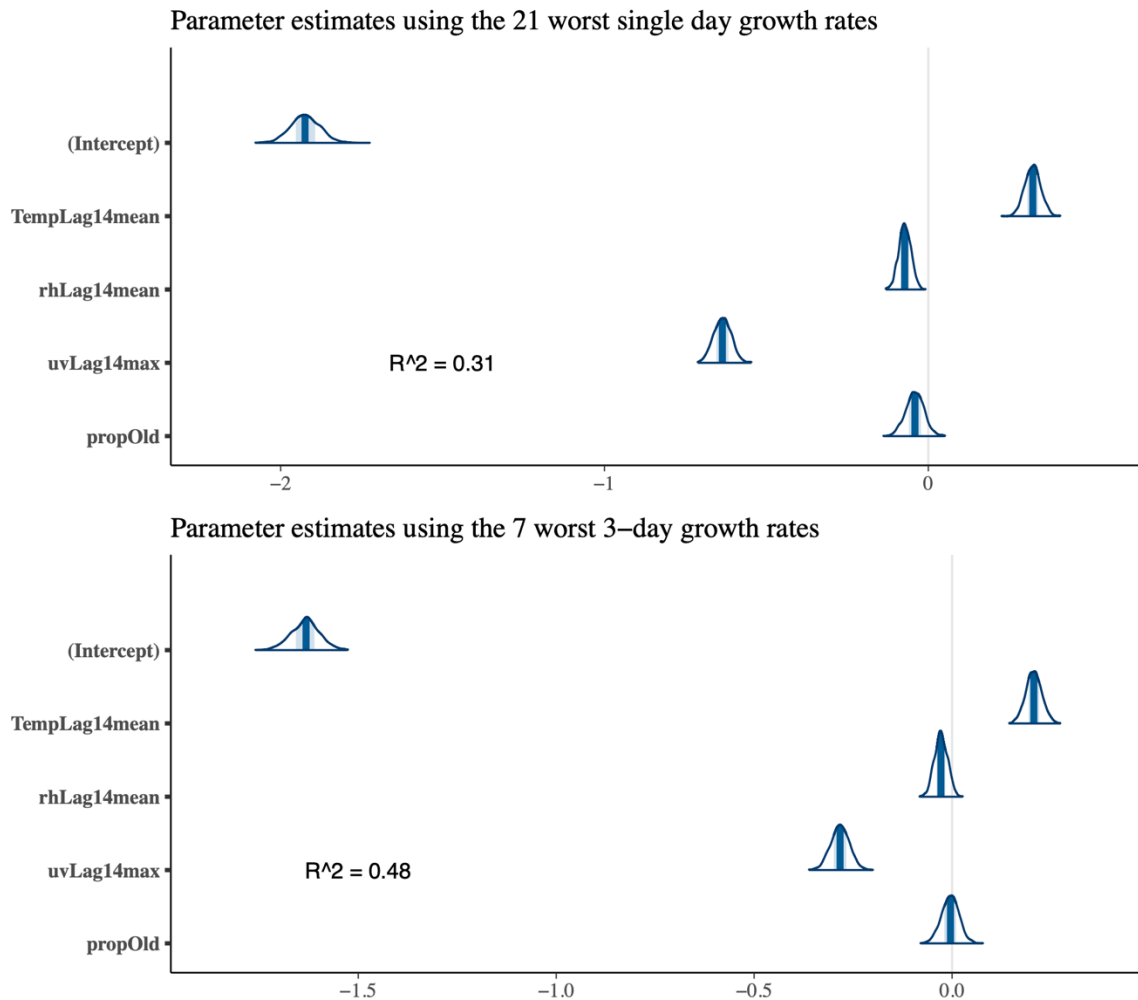

56

57 **Figure S6.** In the main text, we calculated the growth rate of COVID-19 infections over 1-week  
 58 intervals in each polity separately, under the assumption that testing rates were, on average,  
 59 roughly similar over the interval within a given polity. To relax this assumption and examine  
 60 whether our results are robust to it, we built two additional variations on our best model (Fig. 2a,  
 61 main text). In the first variation, we modeled the growth rates of the worst 21 1-day intervals and  
 62 in the second variation we modeled the worst 7 3-day intervals. These models reflect relaxed  
 63 assumptions of shorter time intervals over which testing rates were assumed to remain similar.  
 64 Importantly, the coefficient values, and their relationships to one another are essentially  
 65 unchanged compared to the weekly models in the main text, hence our predictions -which derive  
 66 from these coefficient estimates - are robust to this variation. Not surprisingly, the median  $R^2$   
 67 was lower using 1-day intervals, reflecting additional noise likely driven by regional reporting  
 68 patterns on particular days of the week (e.g., reporting is lowest on Mondays and highest on  
 69 Fridays, globally).

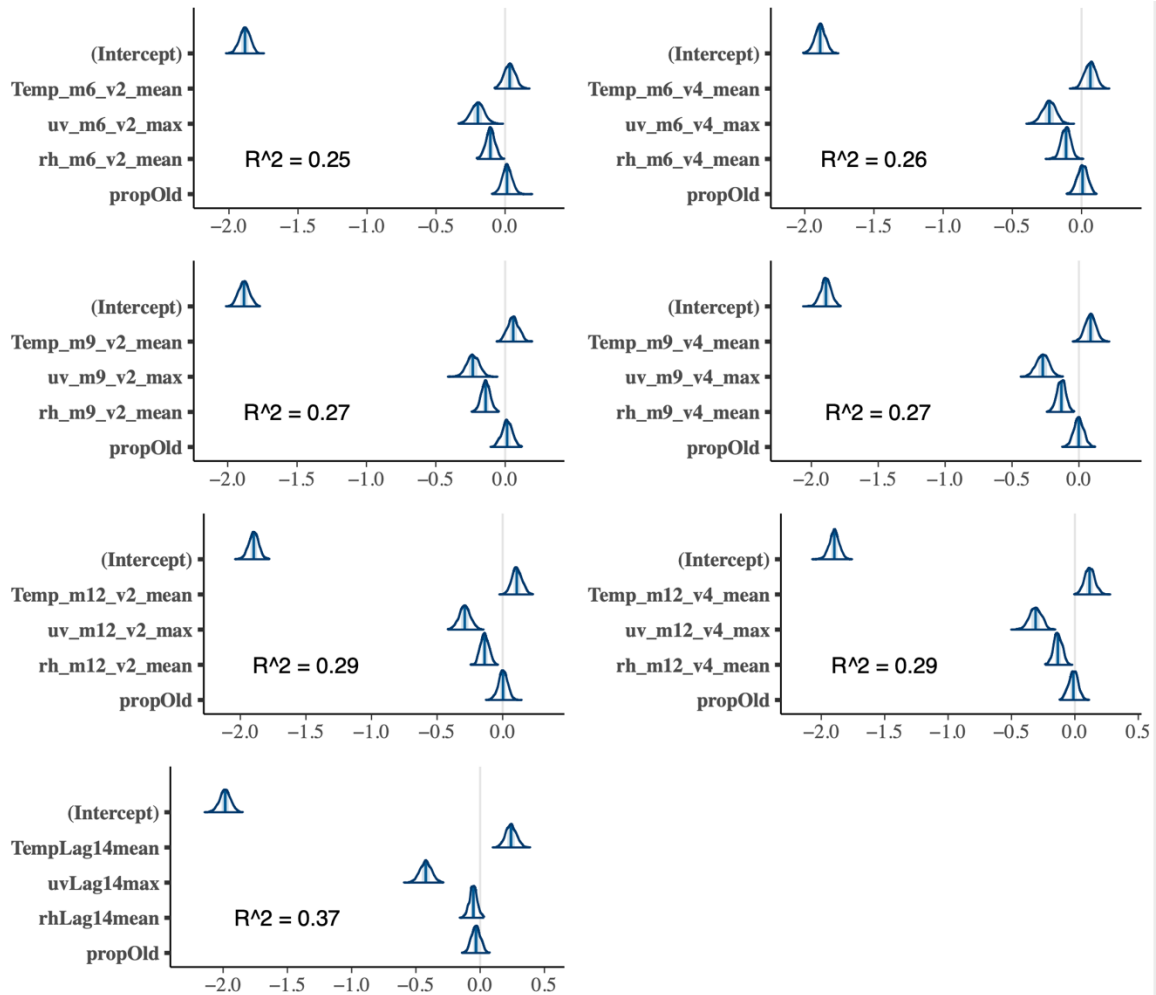

70

71 **Figure S7.** Coefficient estimates from various ways of calculating weather covariates. Notably all  
 72 all show the same pattern as the model in the main text (Fig. 2a, and bottom left panel here) due to  
 73 the strong temporal autocorrelation in weather. In the main text, we present weather covariates  
 74 that were calculated as the (unweighted) average of the 14-day interval preceding a given  
 75 COVID-19 growth rate estimate. This reflects the assumption that each day is equally important in  
 76 determining growth rate. For example, if weather influences if an individual was infected on a  
 77 given day, then each day is equally likely. One might also hypothesize that the weather is most  
 78 important on a particular suite of days rather than across the entire interval, e.g., because the  
 79 typical time for symptoms to emerge is 4-5 days, there may be a few days lag before an individual  
 80 has access to testing, and results of tests can take multiple days to be reported. To examine  
 81 sensitivity in different assumptions about the most important time interval for weather and  
 82 different times when an individual might be infected, we built six additional variations on our best  
 83 model (Fig. 2a). We calculated the same three weather covariates used in the best model (mean  
 84 daily temperature, mean daily relative humidity, and maximum daily UV) over a 21-day lagged  
 85 interval as Gaussian weighted averages centered on 6, 9, and 12 days (denoted m6, m9, m12 in

86 variable names in the figure), each with standard deviation of 2 or 4 (denoted v2 and v4 in  
87 variable names in the figure). All models using the Gaussian weighted variables showed the  
88 same basic patterns, because typically high temporal autocorrelation in weather means that all  
89 variants of weighting schemes will result in similar covariate values (see Fig. S8). It is interesting  
90 that higher explanatory power was found ( $R^2=0.37$ ) when using the unweighted averages,  
91 perhaps indicating that some cumulative effect of weather, rather than instantaneous values on  
92 the day of infection, is important.  
93

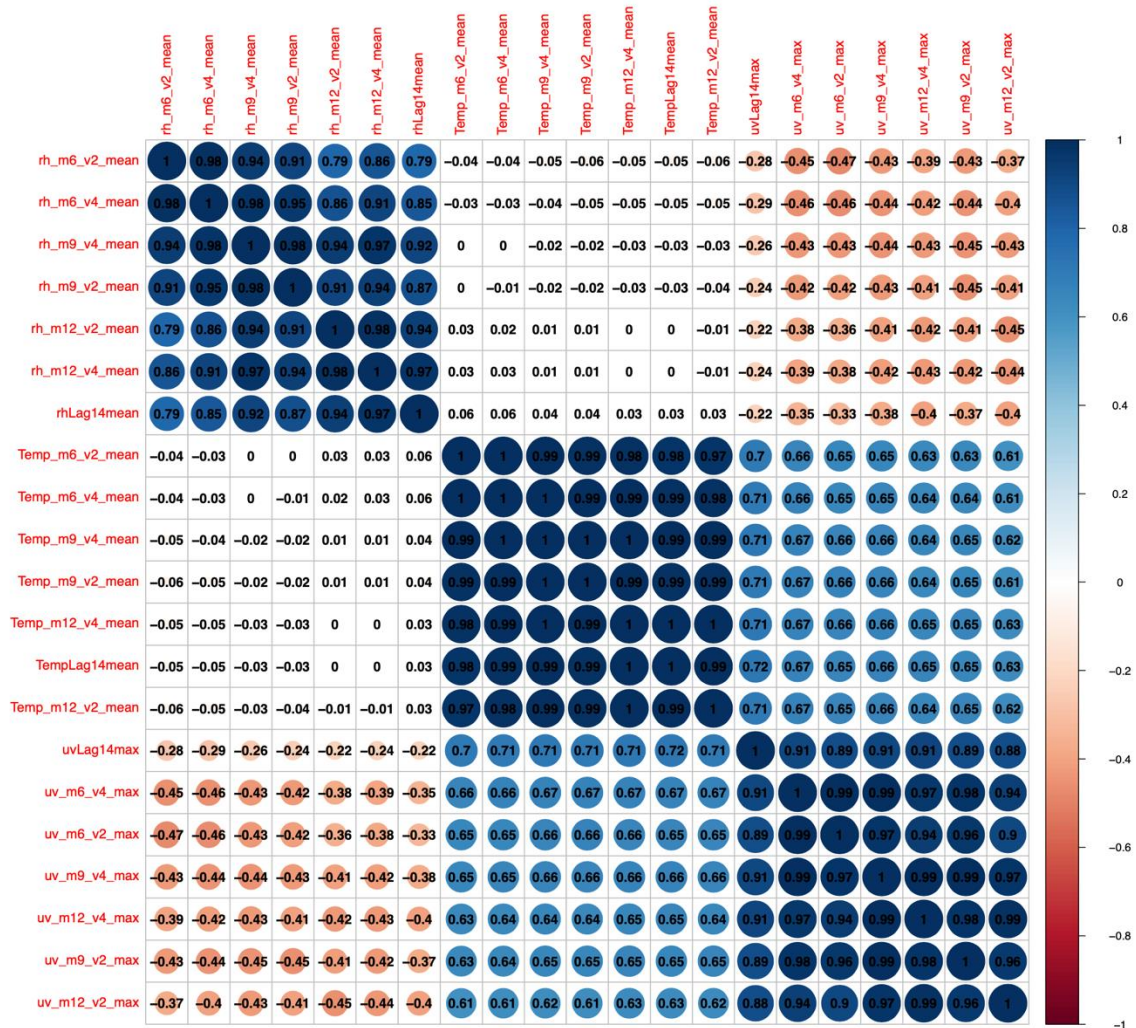

94  
 95  
 96  
 97  
 98  
 99  
 100  
 101  
 102  
 103  
 104  
 105  
 106  
 107  
 108

**Figure S8.** High correlations are apparent among different ways of calculating lagged weather covariates. Gaussian weighted variables showed the same basic patterns as the uniformly weighed 14-day lagged variables, because typically high temporal autocorrelation in weather at each location means that all variants of weighting schemes will result in similar covariate values. Variable names are coded as : Temp=mean daily temperature, rh=mean daily relative humidity, uv= maximum daily UV. Codes m6, m9, and m12 correspond to Gaussian weighting centered on days 6, 9, or 12 days before a recorded positive test. Codes v2 and v4 reflect the standard deviations of 2 or 4, respectively, for these weights. It is evident from these very high correlations within each variable block (7 x 7 blocks on the diagonal) that high temporal autocorrelation in weather means that variable assumptions about the timing of reporting and infection during a 14-day interval does not exhibit sufficient variation to affect our results appreciably. Rather, the important weather variation is among polities, not among daily differences within polities.
